# Supplementary material for: Asymmetric aza-Michael addition under ultra-high pressure: short bias to polyhydroxylated piperidines
Source: Royal Society of Chemistry journal article supplement (doi:10.1039/c1gc15097a), 2011-01-01
Supplement: c1gc15097a.pdf [file c1gc15097a.pdf]

21-Feb-2011  
1: TOF MS ES+  
7.16e4

P25-(01) 465 (3.297) Cm (464:466)

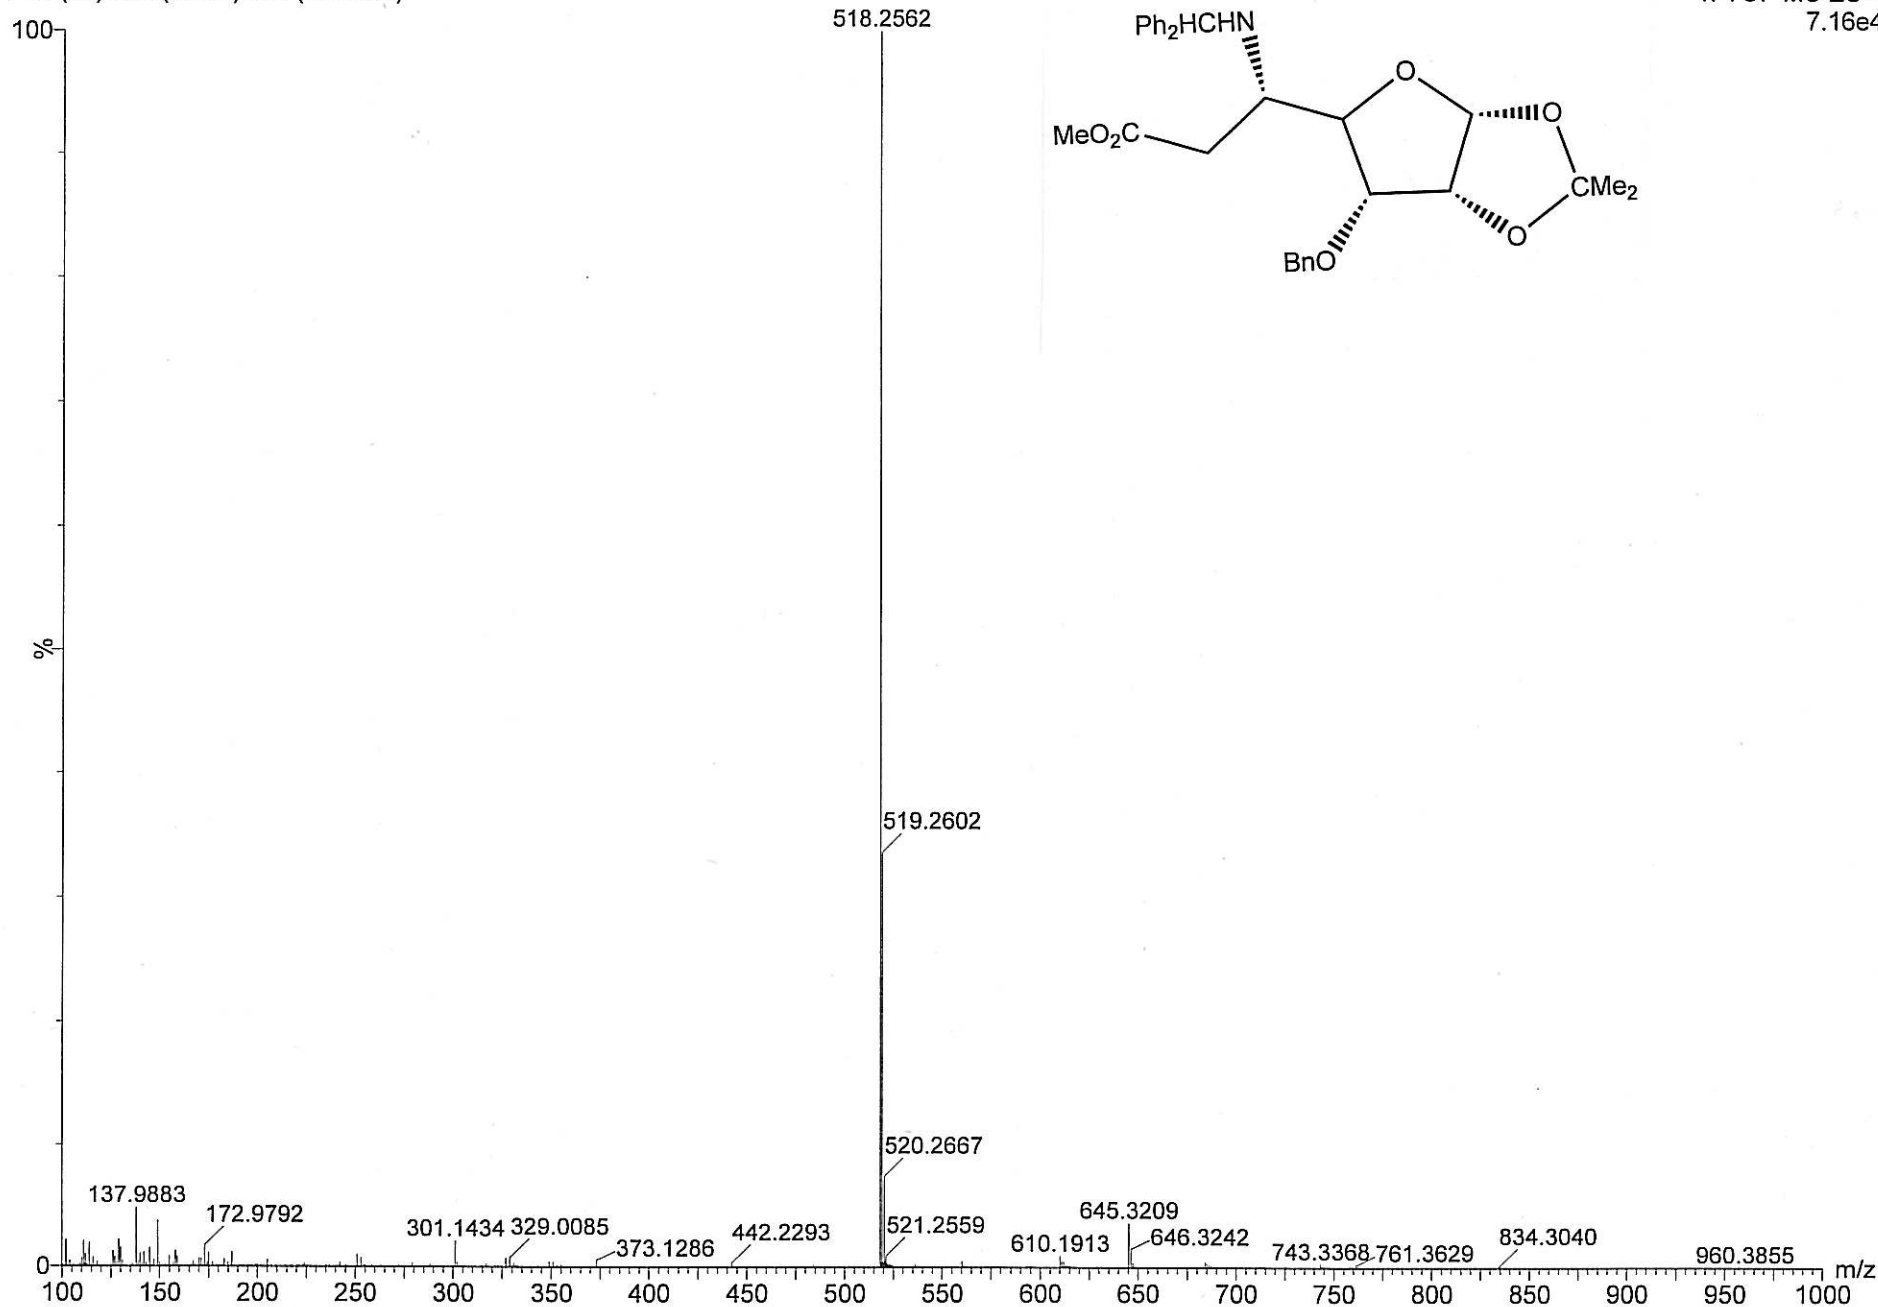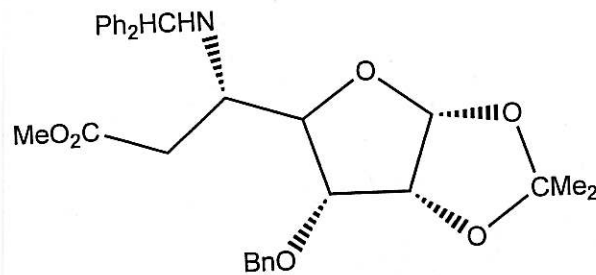

Single Mass Analysis

Tolerance = 10.0 PPM / DBE: min = -1.5, max = 50.0

Element prediction: Off

Number of isotope peaks used for i-FIT = 3

Monoisotopic Mass, Even Electron Ions

1279 formula(e) evaluated with 13 results within limits (up to 20 best isotopic matches for each mass)

Elements Used:

C: 0-70 H: 0-150 N: 0-15 O: 0-15

21-Feb-2011

1: TOF MS ES+

P25-(01) 465 (3.297) Cm (464:466)

7.16e+004

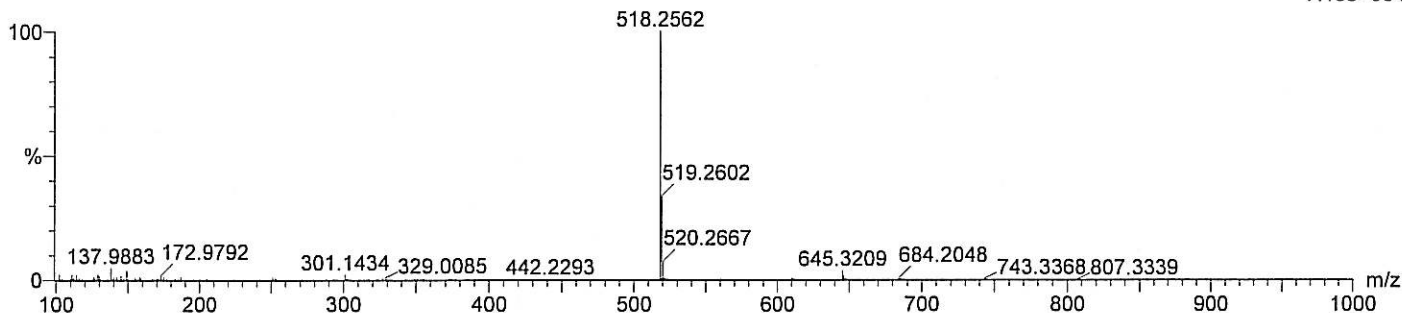

Minimum: -1.5  
Maximum: 5.0 10.0 50.0

| Mass     | Calc. Mass | mDa  | PPM  | DBE  | i-FIT | i-FIT (Norm) | Formula        |
|----------|------------|------|------|------|-------|--------------|----------------|
| 518.2562 | 518.2543   | 1.9  | 3.7  | 14.5 | 177.0 | 0.2          | C31 H36 N O6   |
|          | 518.2516   | 4.6  | 8.9  | 15.5 | 179.4 | 2.6          | C27 H32 N7 O4  |
|          | 518.2556   | 0.6  | 1.2  | 19.5 | 180.1 | 3.2          | C32 H32 N5 O2  |
|          | 518.2529   | 3.3  | 6.4  | 20.5 | 180.4 | 3.5          | C28 H28 N11    |
|          | 518.2601   | -3.9 | -7.5 | 5.5  | 182.0 | 5.2          | C24 H40 N O11  |
|          | 518.2596   | -3.4 | -6.6 | 23.5 | 182.6 | 5.8          | C37 H32 N3     |
|          | 518.2601   | -3.9 | -7.5 | 16.5 | 183.2 | 6.4          | C22 H28 N15 O  |
|          | 518.2588   | -2.6 | -5.0 | 11.5 | 183.5 | 6.7          | C21 H32 N11 O5 |
|          | 518.2575   | -1.3 | -2.5 | 6.5  | 184.1 | 7.3          | C20 H36 N7 O9  |
|          | 518.2561   | 0.1  | 0.2  | 1.5  | 184.8 | 8.0          | C19 H40 N3 O13 |
|          | 518.2548   | 1.4  | 2.7  | 7.5  | 186.0 | 9.2          | C16 H32 N13 O7 |
|          | 518.2534   | 2.8  | 5.4  | 2.5  | 186.4 | 9.6          | C15 H36 N9 O11 |
|          | 518.2606   | -4.4 | -8.5 | -1.5 | 188.1 | 11.3         | C9 H36 N13 O12 |

P23-(01) 478 (3.393) Cm (477:481)

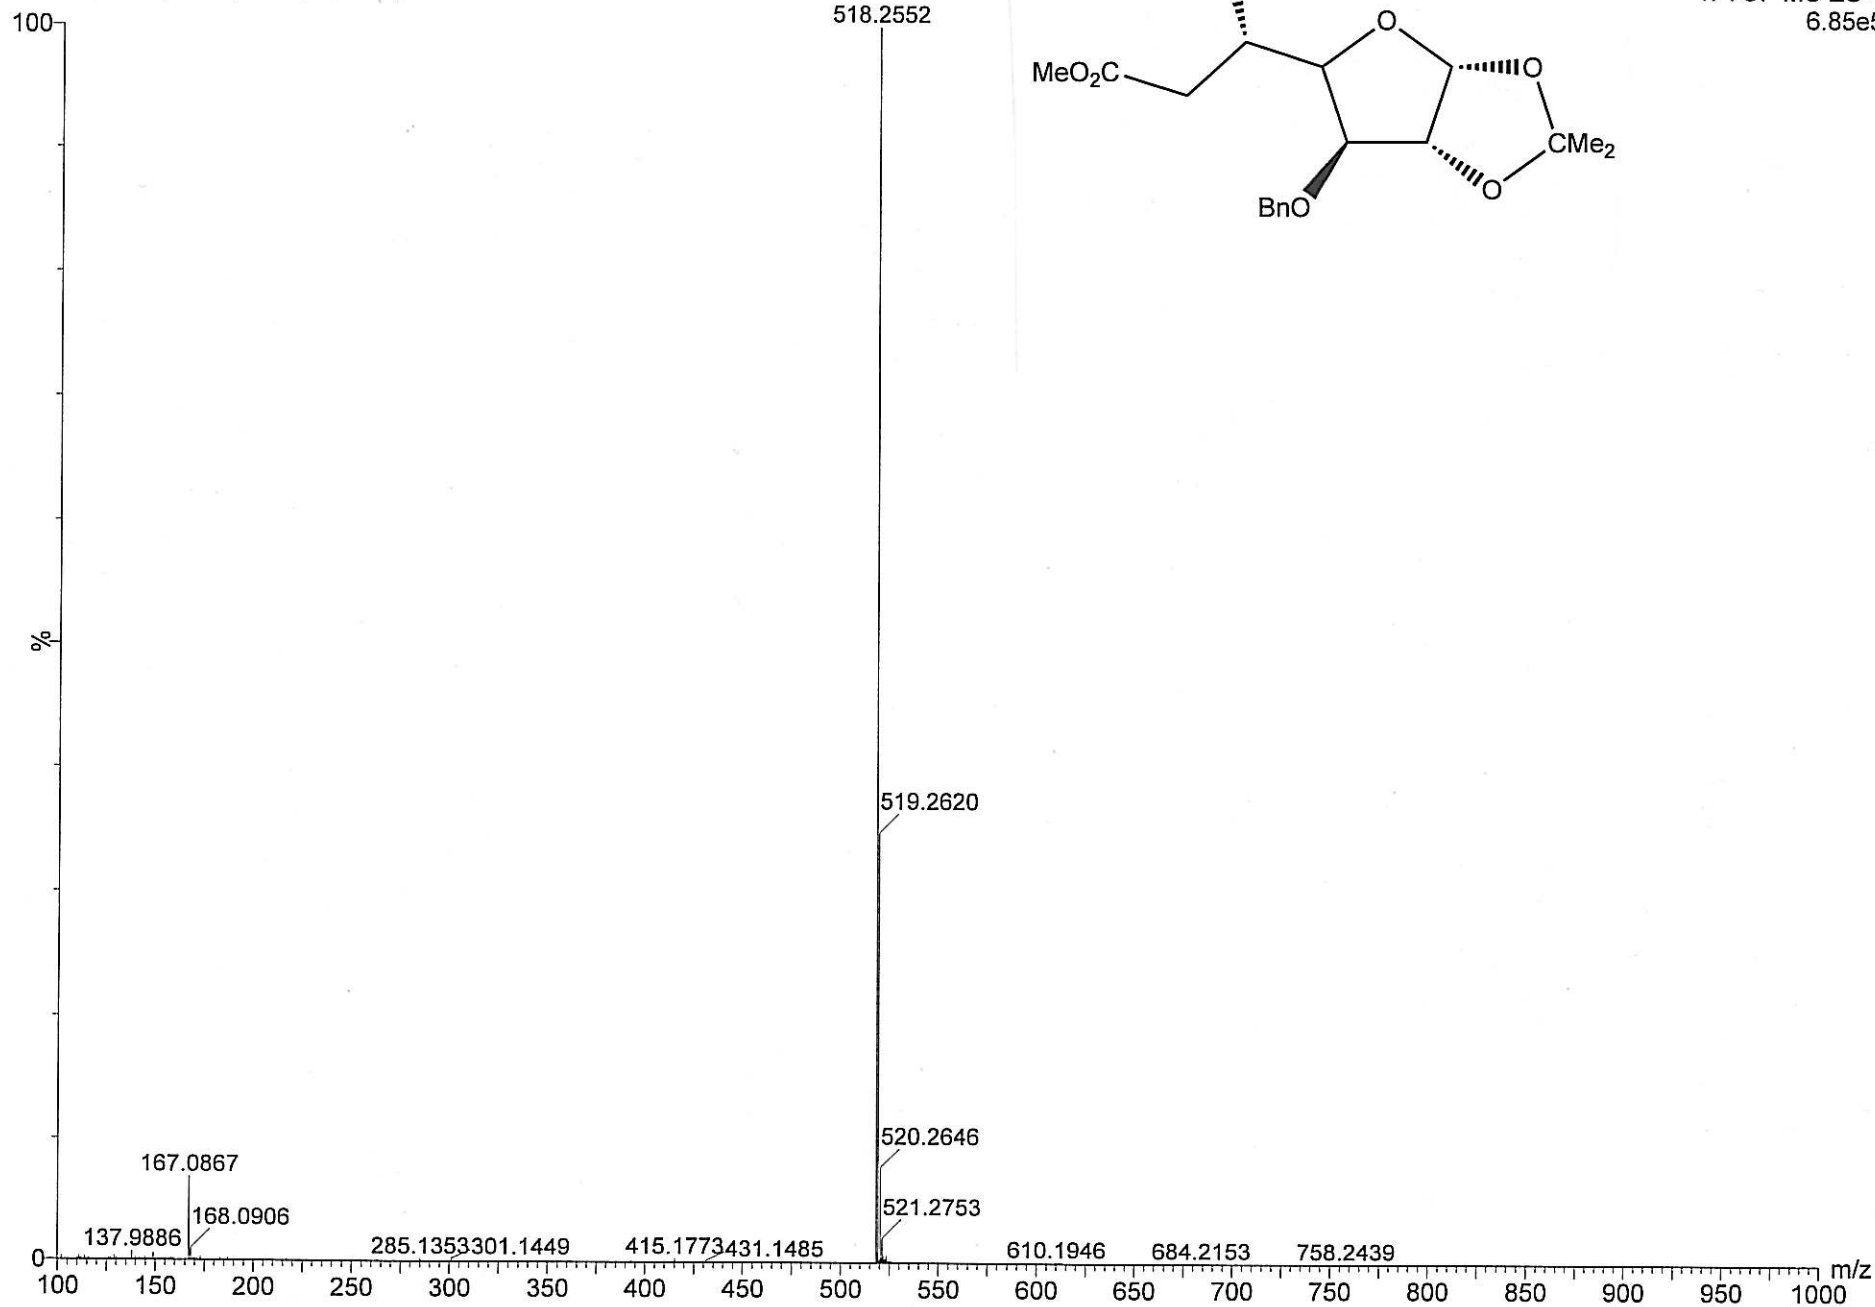

21-Feb-2011  
1: TOF MS ES+  
6.85e5

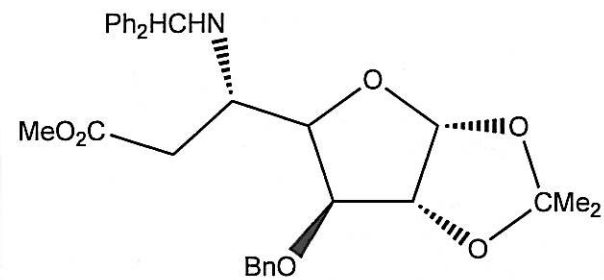

Single Mass Analysis

Tolerance = 10.0 PPM / DBE: min = -1.5, max = 50.0

Element prediction: Off

Number of isotope peaks used for i-FIT = 3

Monoisotopic Mass, Even Electron Ions

1279 formula(e) evaluated with 14 results within limits (up to 20 best isotopic matches for each mass)

Elements Used:

C: 0-70 H: 0-150 N: 0-15 O: 0-15

21-Feb-2011

1: TOF MS ES+

P23-(01) 478 (3.393) Cm (477:481)

6.85e+005

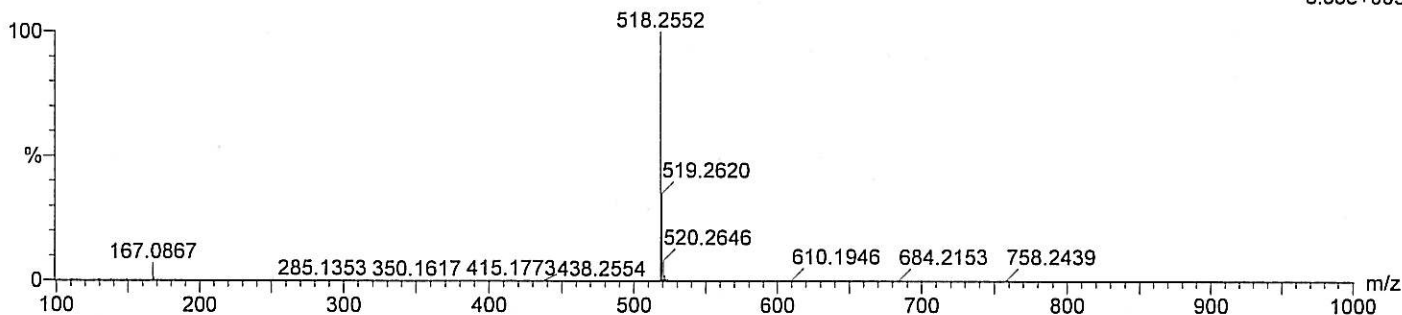

Minimum: -1.5  
Maximum: 5.0 10.0 50.0

| Mass     | Calc. Mass | mDa  | PPM  | DBE  | i-FIT | i-FIT (Norm) | Formula        |
|----------|------------|------|------|------|-------|--------------|----------------|
| 518.2552 | 518.2543   | 0.9  | 1.7  | 14.5 | 343.0 | 0.0          | C31 H36 N O6   |
|          | 518.2556   | -0.4 | -0.8 | 19.5 | 346.6 | 3.7          | C32 H32 N5 O2  |
|          | 518.2516   | 3.6  | 6.9  | 15.5 | 348.2 | 5.2          | C27 H32 N7 O4  |
|          | 518.2529   | 2.3  | 4.4  | 20.5 | 348.2 | 5.3          | C28 H28 N11    |
|          | 518.2502   | 5.0  | 9.6  | 10.5 | 349.2 | 6.2          | C26 H36 N3 O8  |
|          | 518.2596   | -4.4 | -8.5 | 23.5 | 349.7 | 6.7          | C37 H32 N3     |
|          | 518.2601   | -4.9 | -9.5 | 5.5  | 350.1 | 7.2          | C24 H40 N O11  |
|          | 518.2601   | -4.9 | -9.5 | 16.5 | 351.5 | 8.6          | C22 H28 N15 O  |
|          | 518.2588   | -3.6 | -6.9 | 11.5 | 351.8 | 8.8          | C21 H32 N11 O5 |
|          | 518.2575   | -2.3 | -4.4 | 6.5  | 352.1 | 9.2          | C20 H36 N7 O9  |
|          | 518.2561   | -0.9 | -1.7 | 1.5  | 352.6 | 9.6          | C19 H40 N3 O13 |
|          | 518.2548   | 0.4  | 0.8  | 7.5  | 354.0 | 11.1         | C16 H32 N13 O7 |
|          | 518.2534   | 1.8  | 3.5  | 2.5  | 354.3 | 11.4         | C15 H36 N9 O11 |
|          | 518.2507   | 4.5  | 8.7  | 3.5  | 356.0 | 13.0         | C11 H32 N15 O9 |

P15-(01) 373 (2.645) Cm (373:374)

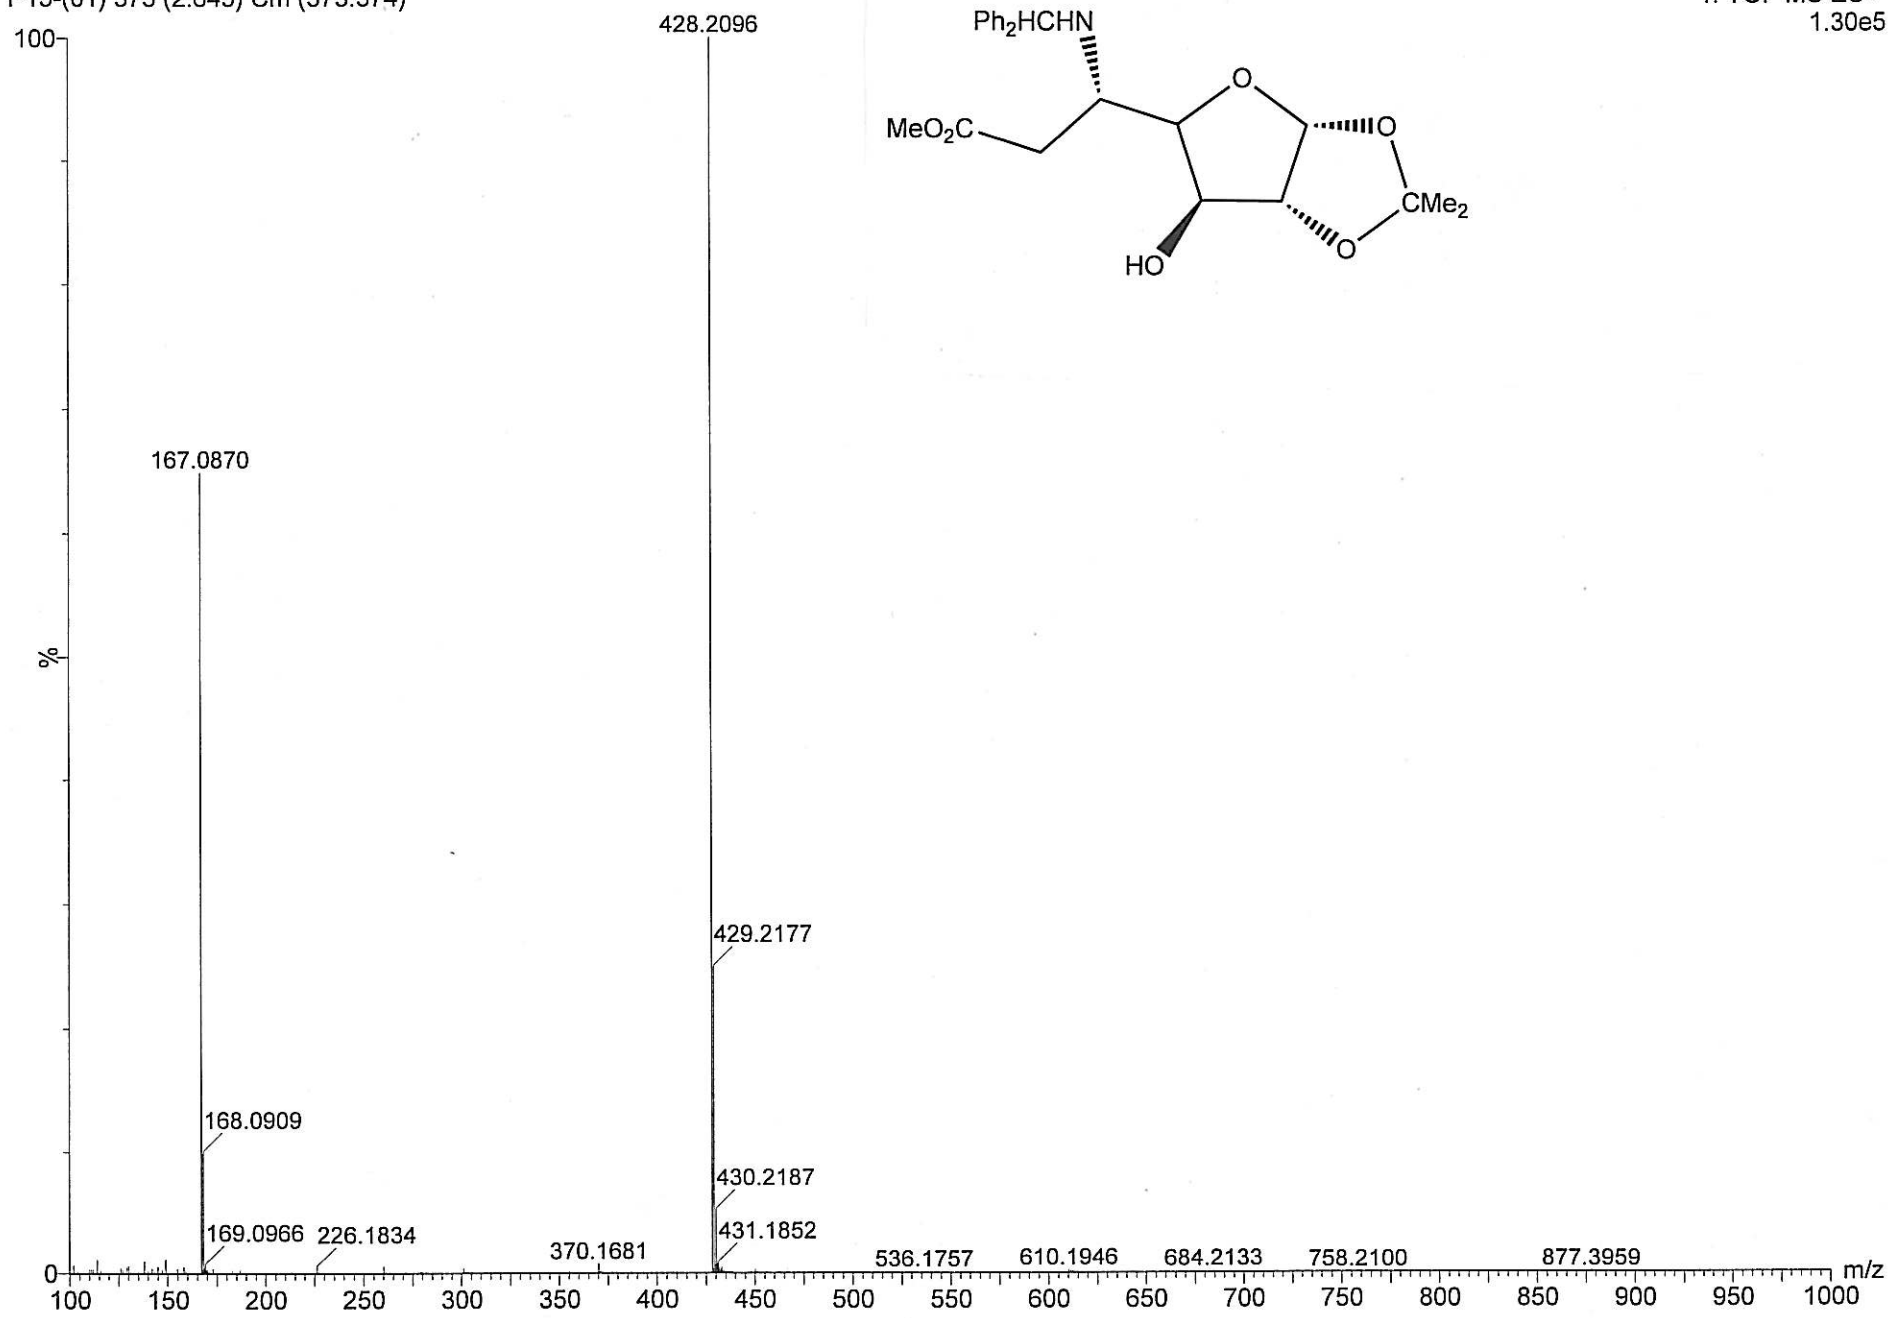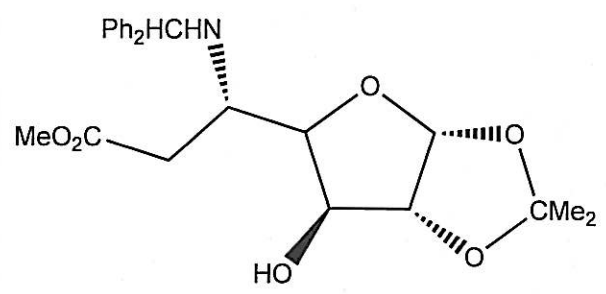

Single Mass Analysis

Tolerance = 10.0 PPM / DBE: min = -1.5, max = 50.0

Element prediction: Off

Number of isotope peaks used for i-FIT = 3

Monoisotopic Mass, Even Electron Ions

993 formula(e) evaluated with 10 results within limits (up to 20 best isotopic matches for each mass)

Elements Used:

C: 0-70 H: 0-150 N: 0-15 O: 0-15

21-Feb-2011

1: TOF MS ES+

P15-(01) 373 (2.645) Cm (373:374)

1.30e+005

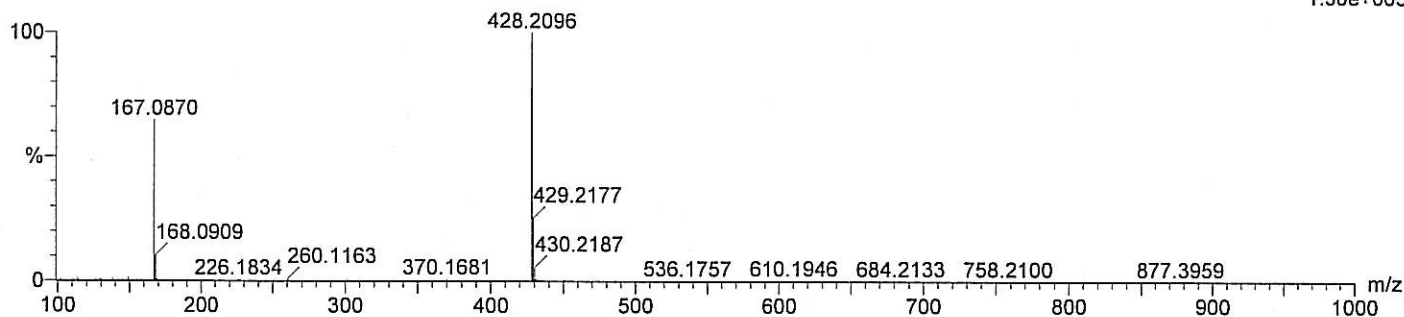

Minimum: -1.5  
Maximum: 5.0 10.0 50.0

| Mass     | Calc. Mass | mDa  | PPM  | DBE  | i-FIT | i-FIT (Norm) | Formula        |
|----------|------------|------|------|------|-------|--------------|----------------|
| 428.2096 | 428.2073   | 2.3  | 5.4  | 10.5 | 210.3 | 0.2          | C24 H30 N O6   |
|          | 428.2087   | 0.9  | 2.1  | 15.5 | 212.8 | 2.7          | C25 H26 N5 O2  |
|          | 428.2132   | -3.6 | -8.4 | 1.5  | 212.8 | 2.7          | C17 H34 N O11  |
|          | 428.2060   | 3.6  | 8.4  | 16.5 | 213.1 | 3.1          | C21 H22 N11    |
|          | 428.2127   | -3.1 | -7.2 | 19.5 | 214.7 | 4.6          | C30 H26 N3     |
|          | 428.2132   | -3.6 | -8.4 | 12.5 | 214.7 | 4.6          | C15 H22 N15 O  |
|          | 428.2118   | -2.2 | -5.1 | 7.5  | 214.8 | 4.8          | C14 H26 N11 O5 |
|          | 428.2105   | -0.9 | -2.1 | 2.5  | 215.3 | 5.2          | C13 H30 N7 O9  |
|          | 428.2078   | 1.8  | 4.2  | 3.5  | 217.4 | 7.3          | C9 H26 N13 O7  |
|          | 428.2065   | 3.1  | 7.2  | -1.5 | 217.8 | 7.7          | C8 H30 N9 O11  |

21-Feb-2011  
1: TOF MS ES+  
5.74e5

P14-(01) 381 (2.708) Cm (380:383)

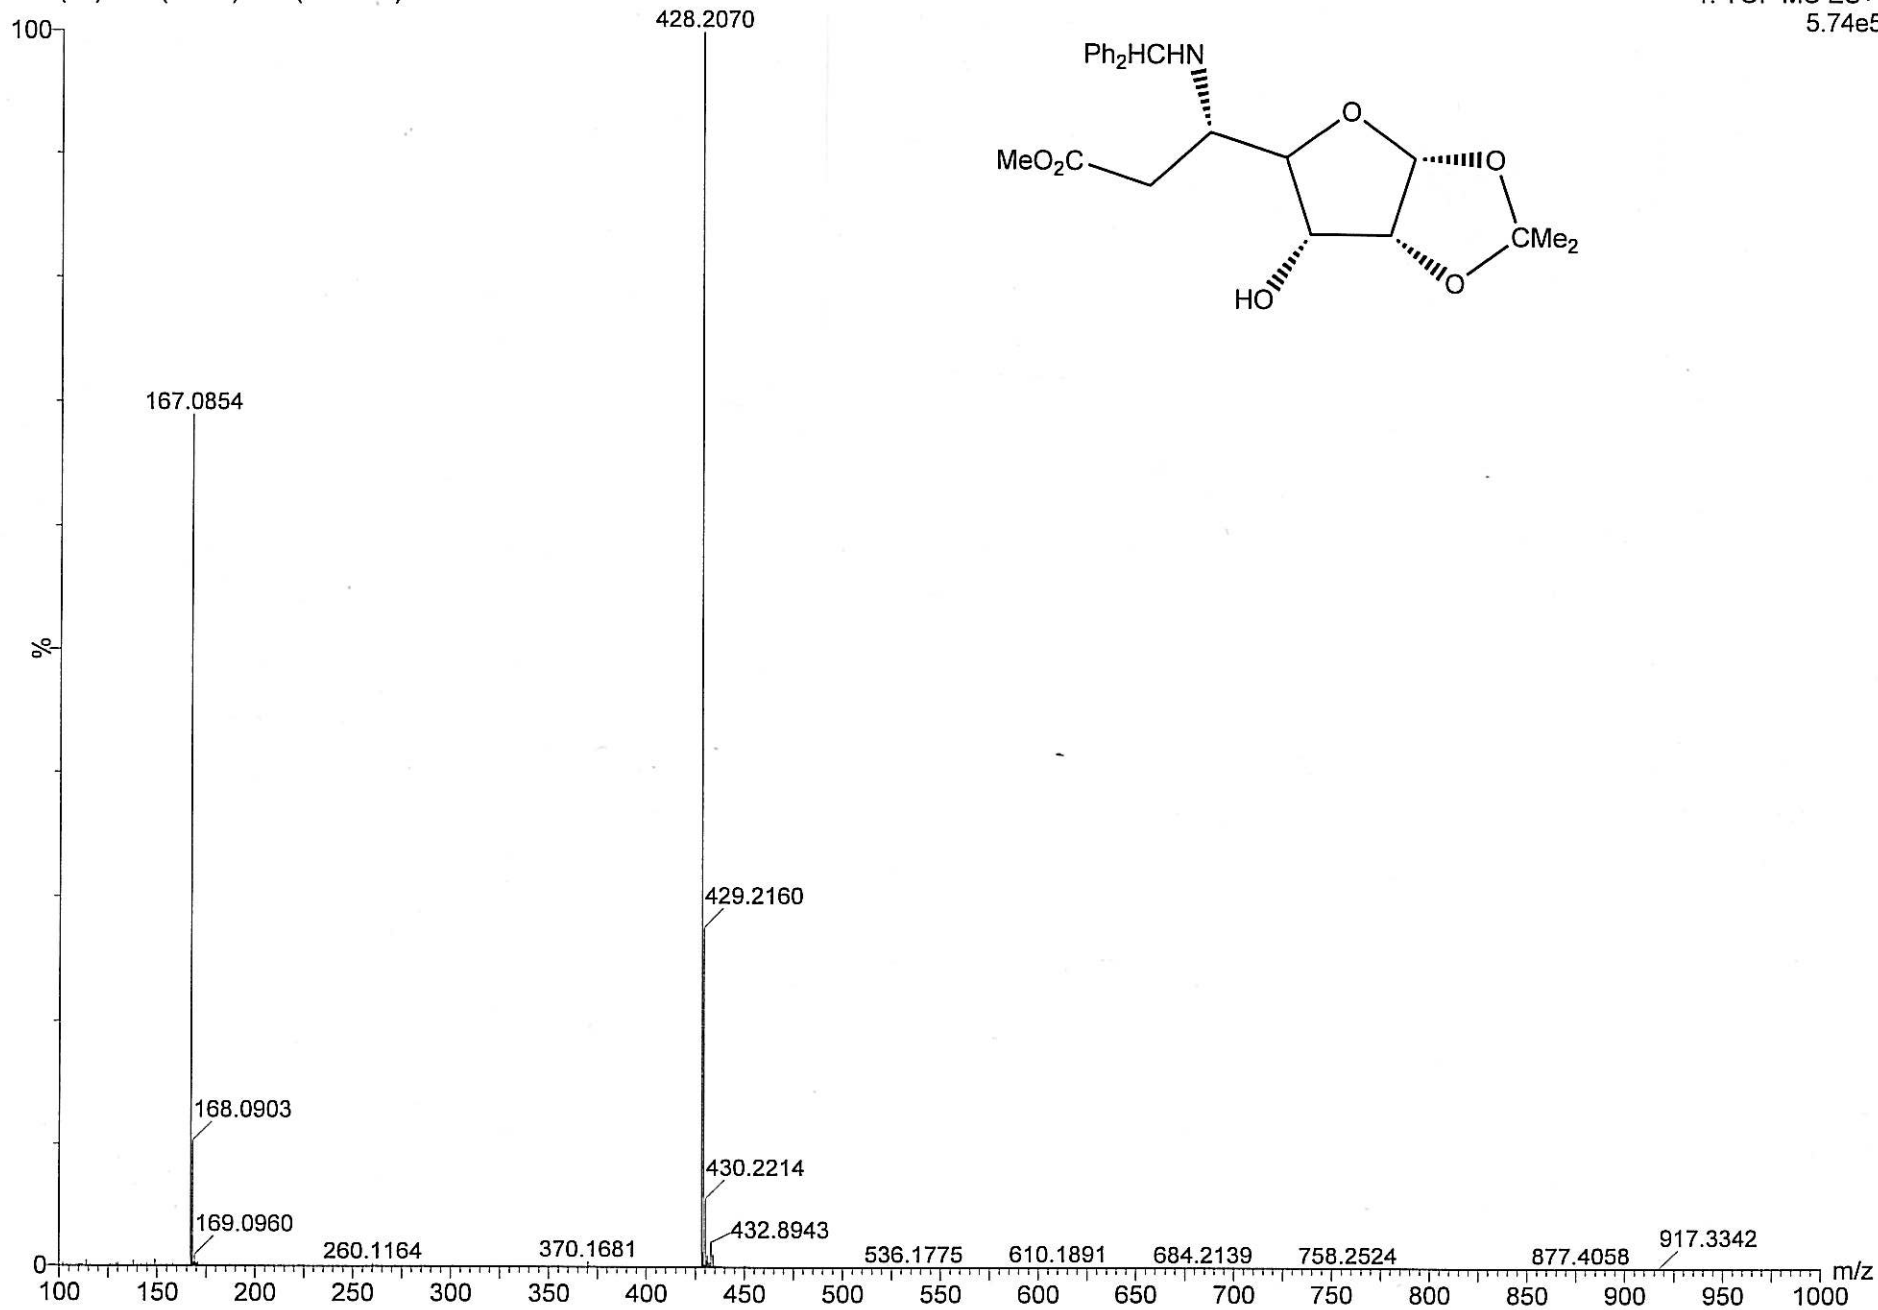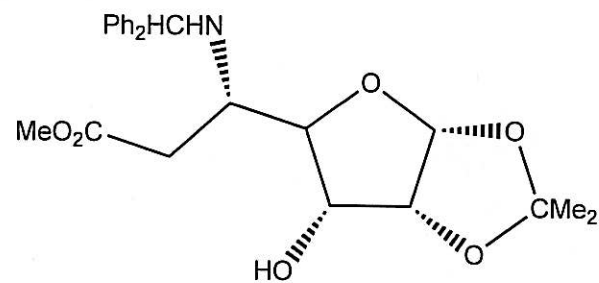

Single Mass Analysis

Tolerance = 10.0 PPM / DBE: min = -1.5, max = 50.0

Element prediction: Off

Number of isotope peaks used for i-FIT = 3

Monoisotopic Mass, Even Electron Ions

993 formula(e) evaluated with 9 results within limits (up to 20 best isotopic matches for each mass)

Elements Used:

C: 0-70 H: 0-150 N: 0-15 O: 0-15

21-Feb-2011

1: TOF MS ES+

P14-(01) 381 (2.708) Cm (380:383)

5.74e+005

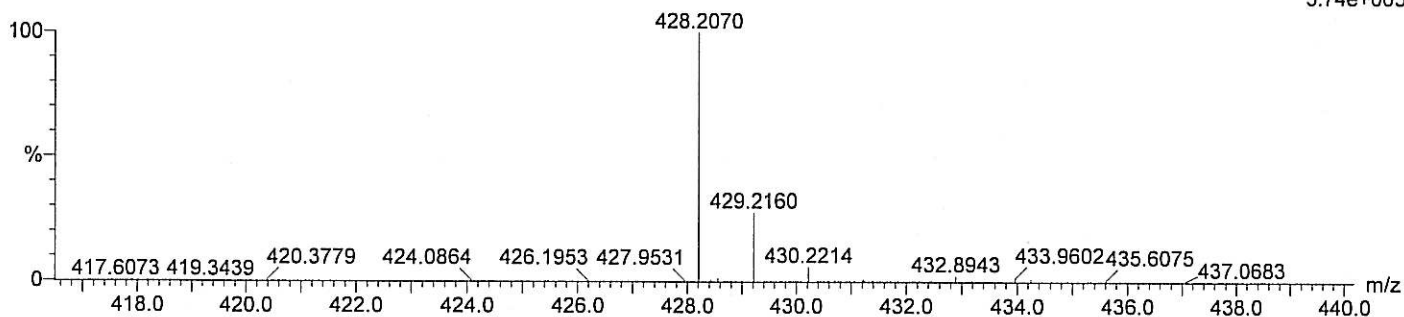

Minimum: -1.5  
 Maximum: 5.0 10.0 50.0

| Mass     | Calc. Mass | mDa  | PPM  | DBE  | i-FIT | i-FIT (Norm) | Formula       |
|----------|------------|------|------|------|-------|--------------|---------------|
| 428.2070 | 428.2073   | -0.3 | -0.7 | 10.5 | 406.0 | 0.1          | C24 H30 N O6  |
|          | 428.2087   | -1.7 | -4.0 | 15.5 | 408.6 | 2.7          | C25 H26 N5 O2 |
|          | 428.2046   | 2.4  | 5.6  | 11.5 | 410.3 | 4.4          | C20 H26 N7 O4 |
|          | 428.2060   | 1.0  | 2.3  | 16.5 | 410.5 | 4.5          | C21 H22 N11   |
|          | 428.2033   | 3.7  | 8.6  | 6.5  | 411.1 | 5.2          | C19 H30 N3 O8 |
|          | 428.2105   | -3.5 | -8.2 | 2.5  | 414.1 | 8.1          | C13 H30 N7 O9 |
|          | 428.2078   | -0.8 | -1.9 | 3.5  | 415.5 | 9.6          | C9 H26 N13 O7 |
|          | 428.2065   | 0.5  | 1.2  | -1.5 | 415.9 | 10.0         | C8 H30 N9 O11 |
|          | 428.2038   | 3.2  | 7.5  | -0.5 | 417.1 | 11.2         | C4 H26 N15 O9 |



P27-(02) 430 (3.054) Cm (430:431)

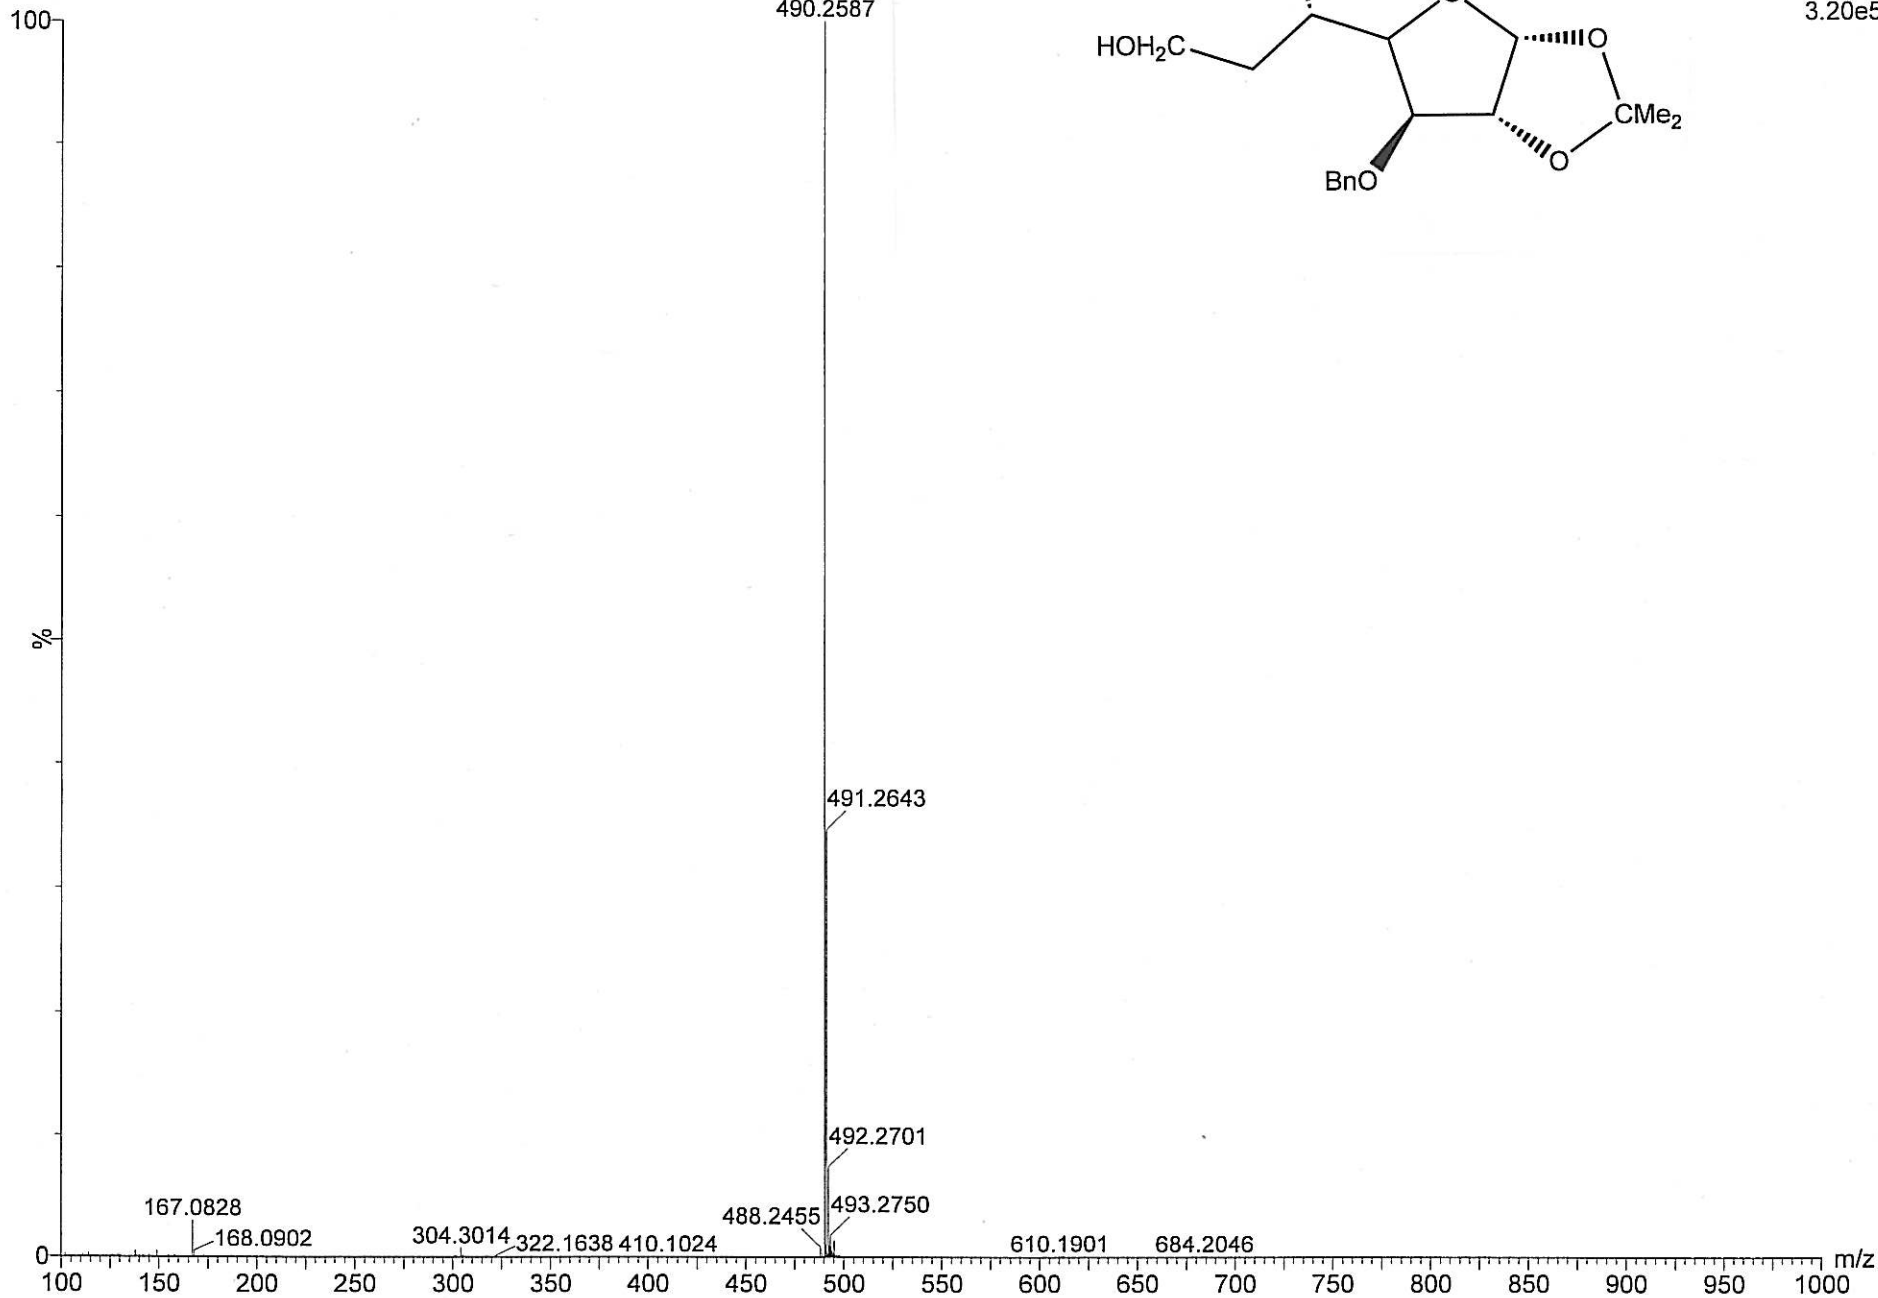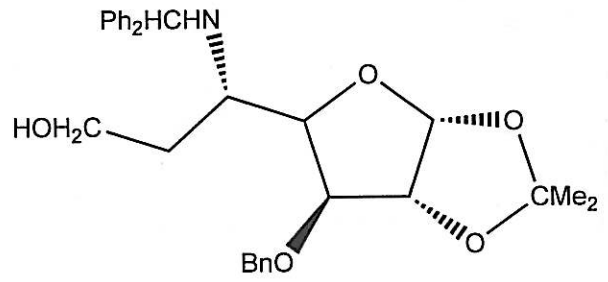

21-Feb-2011  
1: TOF MS ES+  
3.20e5

Single Mass Analysis

Tolerance = 20.0 PPM / DBE: min = -1.5, max = 50.0

Element prediction: Off

Number of isotope peaks used for i-FIT = 3

Monoisotopic Mass, Even Electron Ions

1191 formula(e) evaluated with 21 results within limits (up to 20 best isotopic matches for each mass)

Elements Used:

C: 0-70 H: 0-150 N: 0-15 O: 0-15

21-Feb-2011

1: TOF MS ES+

P27-(02) 430 (3.054) Cm (430:431)

3.20e+005

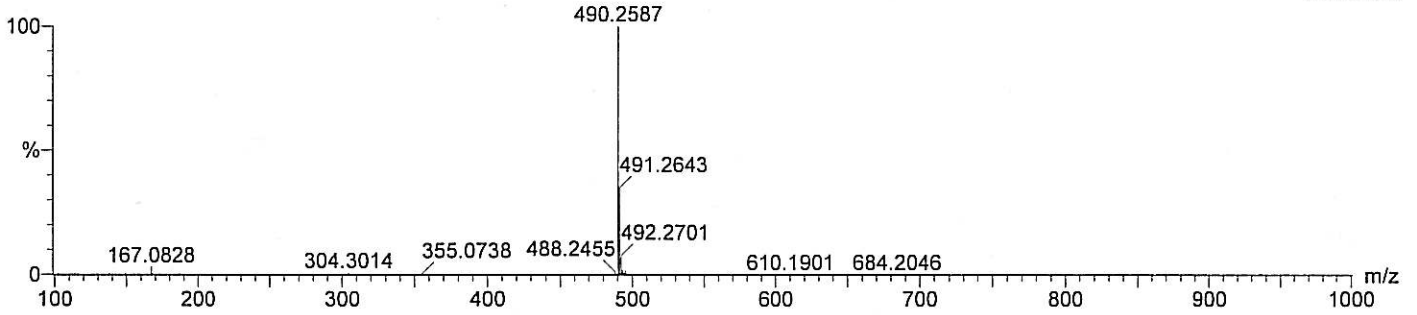

Minimum: -1.5  
Maximum: 5.0 20.0 50.0

| Mass     | Calc. Mass | mDa  | PPM   | DBE  | i-FIT | i-FIT (Norm) | Formula        |
|----------|------------|------|-------|------|-------|--------------|----------------|
| 490.2587 | 490.2593   | -0.6 | -1.2  | 13.5 | 212.9 | 0.1          | C30 H36 N O5   |
|          | 490.2607   | -2.0 | -4.1  | 18.5 | 215.4 | 2.7          | C31 H32 N5 O   |
|          | 490.2495   | 9.2  | 18.8  | 18.5 | 215.5 | 2.8          | C32 H32 N3 O2  |
|          | 490.2567   | 2.0  | 4.1   | 14.5 | 218.1 | 5.4          | C26 H32 N7 O3  |
|          | 490.2535   | 5.2  | 10.6  | 22.5 | 218.9 | 6.2          | C37 H32 N      |
|          | 490.2553   | 3.4  | 6.9   | 9.5  | 219.0 | 6.3          | C25 H36 N3 O7  |
|          | 490.2679   | -9.2 | -18.8 | 14.5 | 219.0 | 6.3          | C25 H32 N9 O2  |
|          | 490.2666   | -7.9 | -16.1 | 9.5  | 219.7 | 7.0          | C24 H36 N5 O6  |
|          | 490.2652   | -6.5 | -13.3 | 4.5  | 220.4 | 7.7          | C23 H40 N O10  |
|          | 490.2540   | 4.7  | 9.6   | 15.5 | 221.0 | 8.3          | C22 H28 N13 O  |
|          | 490.2526   | 6.1  | 12.4  | 10.5 | 221.4 | 8.7          | C21 H32 N9 O5  |
|          | 490.2652   | -6.5 | -13.3 | 15.5 | 221.5 | 8.8          | C21 H28 N15    |
|          | 490.2639   | -5.2 | -10.6 | 10.5 | 221.8 | 9.1          | C20 H32 N11 O4 |
|          | 490.2513   | 7.4  | 15.1  | 5.5  | 222.0 | 9.3          | C20 H36 N5 O9  |
|          | 490.2625   | -3.8 | -7.8  | 5.5  | 222.2 | 9.5          | C19 H36 N7 O8  |
|          | 490.2500   | 8.7  | 17.7  | 0.5  | 222.6 | 9.9          | C19 H40 N O13  |
|          | 490.2612   | -2.5 | -5.1  | 0.5  | 222.7 | 10.0         | C18 H40 N3 O12 |
|          | 490.2500   | 8.7  | 17.7  | 11.5 | 223.3 | 10.6         | C17 H28 N15 O3 |
|          | 490.2599   | -1.2 | -2.4  | 6.5  | 223.8 | 11.1         | C15 H32 N13 O6 |
|          | 490.2585   | 0.2  | 0.4   | 1.5  | 224.0 | 11.3         | C14 H36 N9 O10 |

P28-(01) 324 (2.299) Cm (323:325)

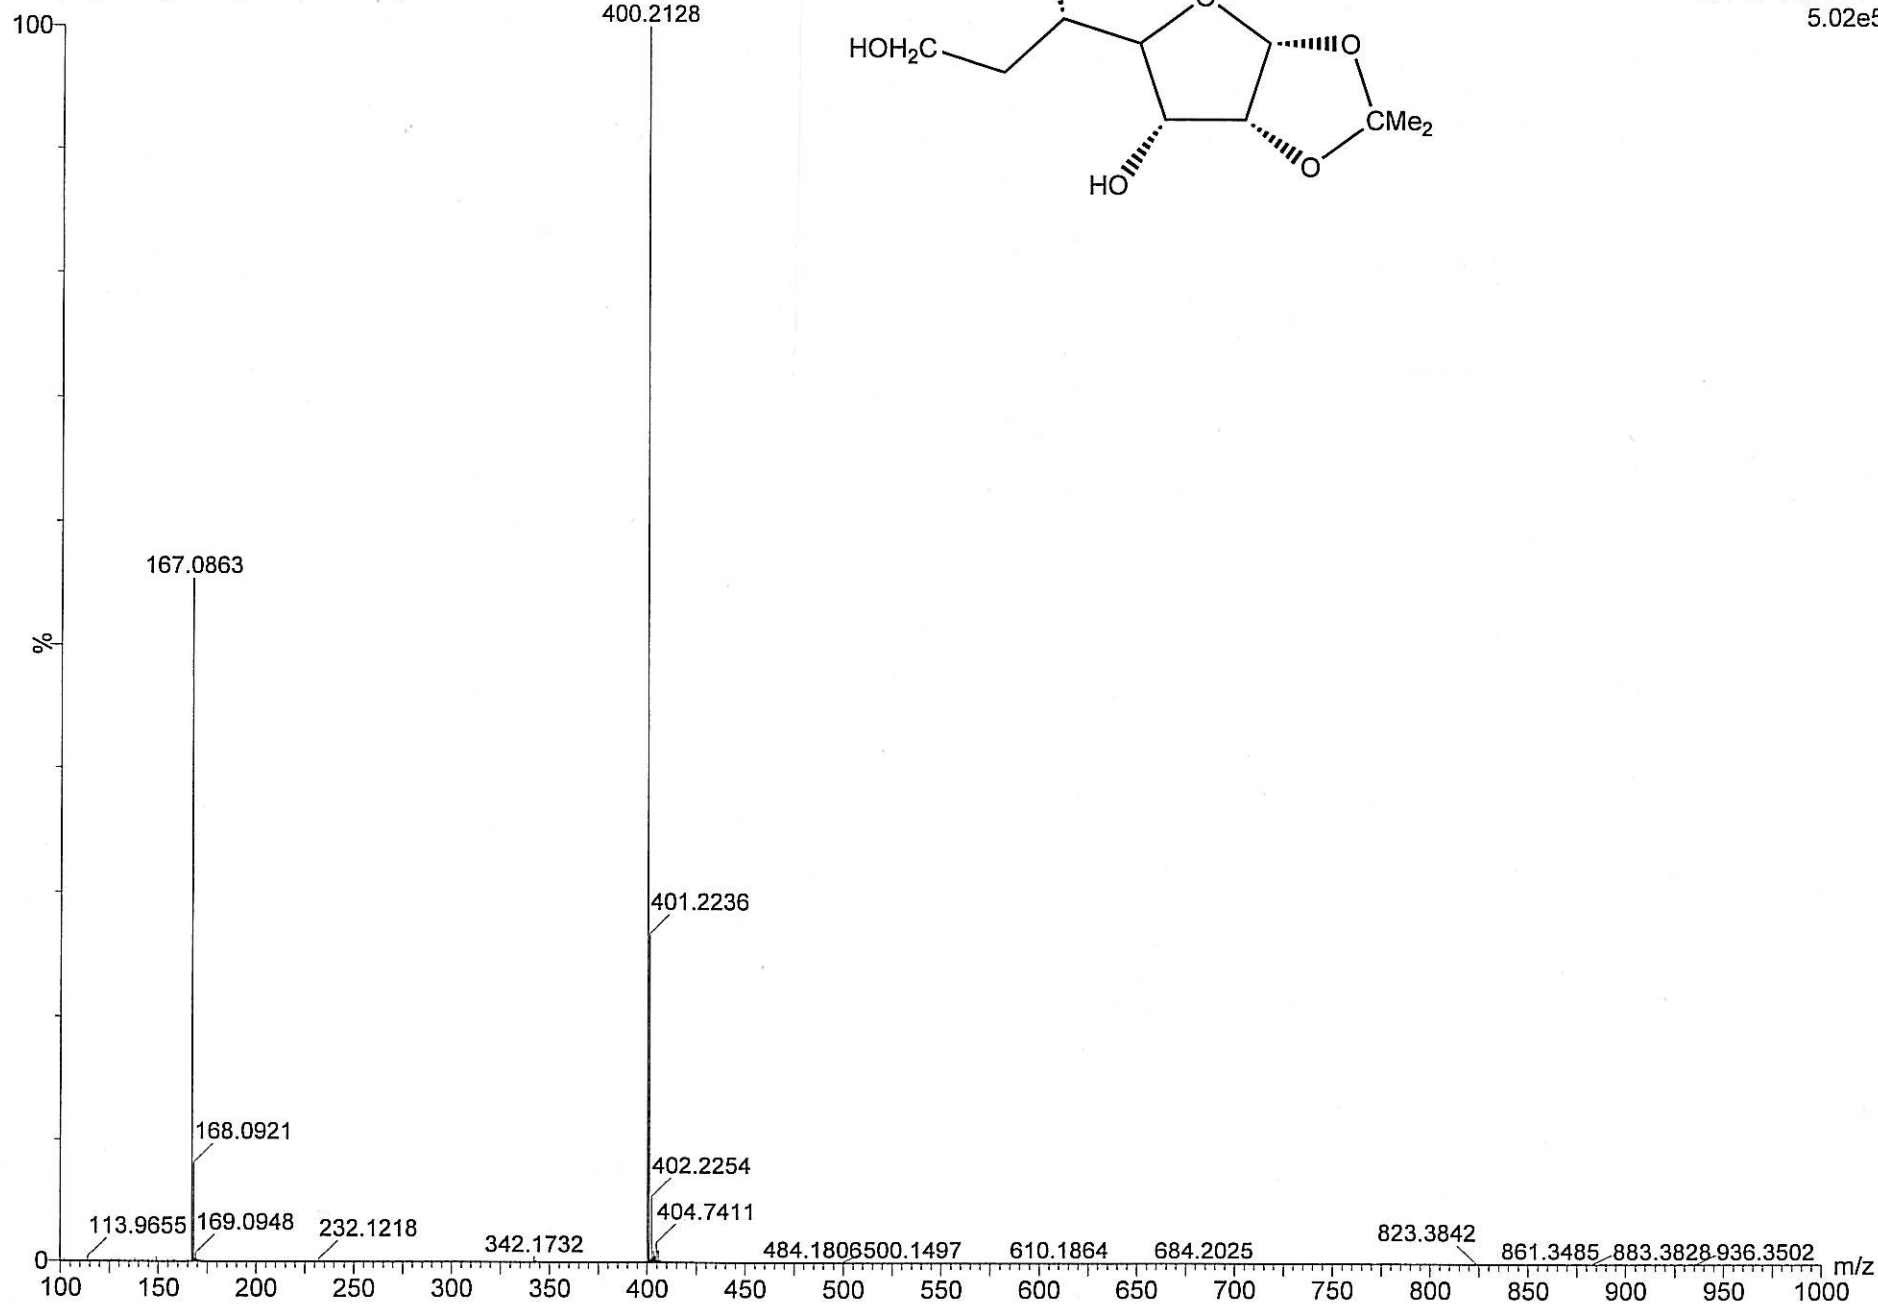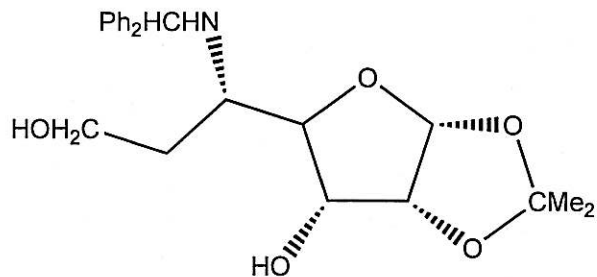

21-Feb-2011  
1: TOF MS ES+  
5.02e5

Single Mass Analysis

Tolerance = 20.0 PPM / DBE: min = -1.5, max = 50.0

Element prediction: Off

Number of isotope peaks used for i-FIT = 3

Monoisotopic Mass, Even Electron Ions

894 formula(e) evaluated with 14 results within limits (up to 20 best isotopic matches for each mass)

Elements Used:

C: 0-70 H: 0-150 N: 0-15 O: 0-15

21-Feb-2011

1: TOF MS ES+

P28-(01) 324 (2.299) Cm (323:325)

5.02e+005

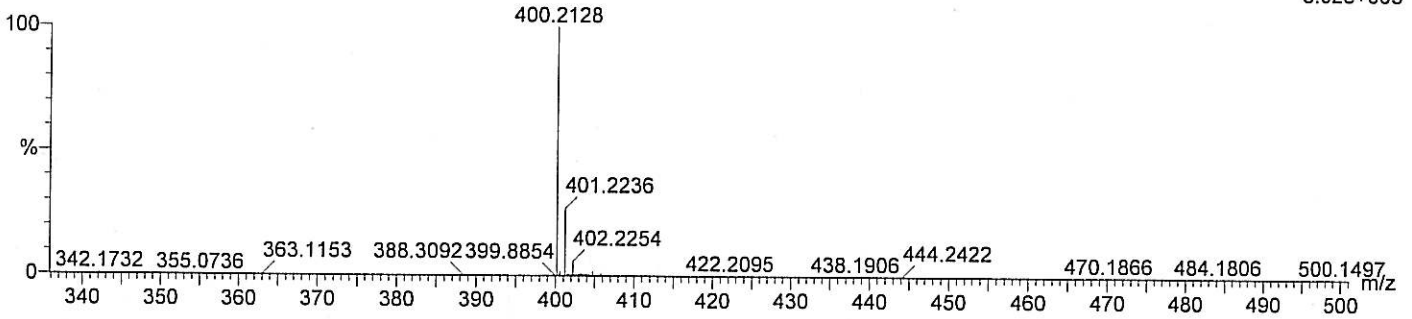

Minimum: -1.5  
Maximum: 5.0 20.0 50.0

| Mass     | Calc. Mass | mDa  | PPM   | DBE  | i-FIT | i-FIT (Norm) | Formula        |
|----------|------------|------|-------|------|-------|--------------|----------------|
| 400.2128 | 400.2124   | 0.4  | 1.0   | 9.5  | 339.4 | 0.2          | C23 H30 N O5   |
|          | 400.2137   | -0.9 | -2.2  | 14.5 | 341.3 | 2.1          | C24 H26 N5 O   |
|          | 400.2097   | 3.1  | 7.7   | 10.5 | 343.0 | 3.8          | C19 H26 N7 O3  |
|          | 400.2084   | 4.4  | 11.0  | 5.5  | 343.5 | 4.3          | C18 H30 N3 O7  |
|          | 400.2065   | 6.3  | 15.7  | 18.5 | 343.5 | 4.3          | C30 H26 N      |
|          | 400.2196   | -6.8 | -17.0 | 5.5  | 344.0 | 4.8          | C17 H30 N5 O6  |
|          | 400.2183   | -5.5 | -13.7 | 0.5  | 344.7 | 5.5          | C16 H34 N O10  |
|          | 400.2070   | 5.8  | 14.5  | 11.5 | 345.3 | 6.1          | C15 H22 N13 O  |
|          | 400.2057   | 7.1  | 17.7  | 6.5  | 345.7 | 6.4          | C14 H26 N9 O5  |
|          | 400.2183   | -5.5 | -13.7 | 11.5 | 345.8 | 6.6          | C14 H22 N15    |
|          | 400.2169   | -4.1 | -10.2 | 6.5  | 346.0 | 6.8          | C13 H26 N11 O4 |
|          | 400.2156   | -2.8 | -7.0  | 1.5  | 346.4 | 7.2          | C12 H30 N7 O8  |
|          | 400.2129   | -0.1 | -0.2  | 2.5  | 347.9 | 8.7          | C8 H26 N13 O6  |
|          | 400.2089   | 3.9  | 9.7   | -1.5 | 349.5 | 10.3         | C3 H26 N15 O8  |
